# Supplementary material for: A novel bifunctional catalyst for overall water electrolysis: nano IrxMn(1−x)Oy hybrids with L12-IrMn3 phase
Source: Royal Society of Chemistry journal article supplement (doi:10.1039/d1cc06062g), 2021-12-09
Supplement: d1cc06062g1.pdf [file d1cc06062g1.pdf]

## Electronic Supplementary Information

### **A novel bifunctional catalyst for overall water electrolysis: nano $\text{Ir}_x\text{Mn}_{(1-x)}\text{O}_y$ hybrids with $\text{L1}_2\text{-IrMn}_3$ phase**

Zhandong Ren,<sup>‡</sup> Yanyan Wang,<sup>‡</sup> Hucheng Jiang, Hongwei Jiang, Miaojie Tian, Ye Liu, Juanjuan Han,\* Hua Fang and Yuchan Zhu\*

School of Chemical and Environmental Engineering, Wuhan Polytechnic University, Wuhan, 430023,  
P. R. China.

<sup>‡</sup> Z.D.R. and Y.Y.W. contributed equally to this work.

\* Corresponding author:

Yuchan Zhu, Professor, School of Chemical and Environmental Engineering, Wuhan Polytechnic University, Wuhan, 430023, P. R. China.

E-mail: [zhuyuchan@163.com](mailto:zhuyuchan@163.com). Tel.: 86-27-83943956.

Juanjuan Han, Professor, School of Chemical and Environmental Engineering, Wuhan Polytechnic University, Wuhan, 430023, P. R. China.

E-mail: [jjhan@whu.edu.cn](mailto:jjhan@whu.edu.cn). Tel.: 86-27-83943956.

## 1. Experimental methods

### 1.1 Chemicals and materials

Chloroiridic acid ( $\text{H}_2\text{IrCl}_6 \cdot 6\text{H}_2\text{O}$ , AR), manganese nitrate ( $\text{Mn}(\text{NO}_3)_2$ , AR), acetone ( $\text{CH}_3\text{COCH}_3$ , AR), ethanol ( $\text{C}_2\text{H}_5\text{OH}$ , AR), oxalic acid ( $\text{C}_2\text{H}_2\text{O}_4$ , AR), n-butanol ( $\text{C}_4\text{H}_9\text{OH}$ , AR), sulphuric acid ( $\text{H}_2\text{SO}_4$ , AR) and titanium foil (Ti, 99.999%) were purchased from Sinopharm Chemical Reagent Co. Ltd., Shanghai, China. Commercial Pt/C (40 wt% and 60 wt% loading, 2-5 nm Pt size) was purchased from Johnson Matthey Co. Ltd. All reagents were analytical grade and used without further purification. Argon gas (99.999%) and oxygen gas (99.9%) was purchased from Ming-Hui Company. The water ( $18.25 \text{ M}\Omega \text{ cm}^{-1}$ ) used in all experiments was prepared by passing through an ultra-pure purification system.

### 1.2 Preparation of $\text{Ir}_x\text{Mn}_{(1-x)}\text{O}_y$ hybrids

Titanium (Ti) foil is used as the electrode substrate, and the area is  $1 \times 1 \text{ cm}$ . In order to remove impurities and oil stains on the surface of the Ti foil, the Ti foil was cleaned in acetone, ultrapure water and ethanol respectively. Finally, the clean Ti foil was placed in oxalic acid with a mass fraction of 10 % and treated at  $95 \text{ }^\circ\text{C}$  for 2 h, and then cleaned and dried for later use.

As shown in scheme 1,  $\text{Ir}_x\text{Mn}_{(1-x)}\text{O}_y$  hybrids based on Ti foil was prepared by sol-gel and thermal decomposition method without the use of surfactants. The detailed experimental steps are as follows. A typical  $\text{Ir}_x\text{Mn}_{(1-x)}\text{O}_y$  hybrids ( $x=0.2$ ) electrode is prepared by the following detailed steps. 0.0110 g  $\text{H}_2\text{IrCl}_6 \cdot 6\text{H}_2\text{O}$  and 0.0088 g

$\text{Mn}(\text{NO}_3)_2$  were respectively added into the mixed solvent of ethanol and n-butanol with a volume ratio of 1:1. The total metal ion concentration is  $0.02 \text{ mol L}^{-1}$ . Magnetic stirring continuously for 24 h to form hydrosol. After the solution is uniformly dispersed by ultrasonic,  $25 \text{ }\mu\text{L}$  of the solution is dripped onto the Ti foil. When the surface solvent is completely volatilized, it is calcined at  $400 \text{ }^\circ\text{C}$  in the mixed gas of Ar- $\text{O}_2$  (10 %  $\text{O}_2$ ) for 1h. The  $\text{Ir}_x\text{Mn}_{(1-x)}\text{O}_y$  hybrids ( $x=0.2$ ) electrode can be obtained through the above preparation steps. The loading of Ir is about  $19.2 \text{ }\mu\text{g cm}^{-2}$ . For different proportions of  $\text{Ir}_x\text{Mn}_{(1-x)}\text{O}_y$  hybrids electrodes, the preparation process is as follows. At first, while keeping the total metal ion concentration at  $0.02 \text{ mol L}^{-1}$ , the atomic ratios of Ir and Mn were adjusted to 1:9, 2:8, 3:7, 5:5, 6:4 and 8:2, respectively, to obtain  $\text{Ir}_x\text{Mn}_{(1-x)}\text{O}_y$  hybrids with different ratios. The loading of Ir is about  $9.6 \sim 76.9 \text{ }\mu\text{g cm}^{-2}$  for different ratios of  $\text{Ir}_x\text{Mn}_{(1-x)}\text{O}_y$  hybrids.

### *1.3 Preparation of $\text{IrO}_2$ and Ir*

$\text{IrO}_2$  was prepared by the common thermal decomposition method. Accurately prepare  $\text{H}_2\text{IrCl}_6$  solution with concentration of  $0.02 \text{ mol L}^{-1}$ , and its solvent is ethanol-n-butanol mixed solution with volume ratio of 1:1. The solution was stirred for 2 h so that it was mixed evenly. Transfer  $5 \text{ }\mu\text{L}$  solution and evenly coat it on the Ti foil. After the surface solvent is completely volatilized, it is calcined at  $400 \text{ }^\circ\text{C}$  in air atmosphere for 1h to obtain the  $\text{IrO}_2$  electrode. Similarly, the Ir electrode can be obtained by calcining at  $400^\circ\text{C}$  for 1h in argon atmosphere. The loading of Ir is about  $19.2 \text{ }\mu\text{g cm}^{-2}$ .

#### *1.4 Preparation of Mn<sub>2</sub>O<sub>3</sub>*

Mn<sub>2</sub>O<sub>3</sub> was prepared by the common thermal decomposition method. Accurately prepare Mn(NO<sub>3</sub>)<sub>2</sub> solution with concentration of 0.02 mol L<sup>-1</sup>, and its solvent is ethanol-n-butanol mixed solution with volume ratio of 1:1. The solution was stirred for 2 h so that it was mixed evenly. Transfer 40 μL solution and evenly coat it on the Ti foil. After the surface solvent is completely volatilized, it is calcined at 400 °C in air atmosphere for 1h to obtain the Mn<sub>2</sub>O<sub>3</sub> electrode. The loading of Mn is about 22.0 μg cm<sup>-2</sup>.

#### *1.5 Preparation of 40 wt% Pt/C and 60 wt% Pt/C*

Add 1 mg of commercial 40 wt% Pt/C or 60 wt% Pt/C sample to 1 mL of 0.05 wt% nafion-ethanol solution, and ultrasonically disperse uniformly. Pipette 48 μL of catalyst ink droplets on a Ti foil with an electrode area of 1.0 cm<sup>2</sup> to prepare a 40wt% Pt/C electrode. The loading of Pt is about 19.2 and 28.8 μg cm<sup>-2</sup> for the 40 wt% Pt/C and 60 wt% Pt/C, respectively.

#### *1.6 Material characterization*

X-ray diffraction (XRD) patterns were acquired on an XRD-7000 X-ray diffractometer (Shimadzu, Japan). Transmission Electron Microscopy (TEM) were conducted on an JEM-2100F (JEOL, Japan). Scanning Electron Microscope (SEM) images were taken with a ΣIGMA field-emission SEM (Zeiss, Germany). X-ray photoelectron spectrometry (XPS: ESCLAB 250Xi, Thermo Fisher Scientific, The

United States) with monochromatized Al K $\alpha$  radiation was used to analyze the electronic properties. Analysis of the composition of the electrode was carried out by X-ray fluorescence (XRF: EDX-7000, Shimadzu, Japan).

### *1.7 Electrochemical measurements*

The electrochemical experiments were carried out in a typical three-electrode electrochemical cell with a carbon paper as a counter electrode (TGP-H-090, Toray, Japan). The reference electrode is Hg/Hg<sub>2</sub>SO<sub>4</sub>/K<sub>2</sub>SO<sub>4</sub>(0.1 M) and Hg/HgO/KOH(1.0 M) (R0501, Tianjin Aida Hengsheng Technology Development Co., Ltd, China) respectively for acidic and alkaline solutions. Cyclic voltammetry (CV) measurements were performed in Ar-saturated 0.5 M H<sub>2</sub>SO<sub>4</sub> solution at the scan rate of 100 mV s<sup>-1</sup>. The activities of hydrogen evolution reaction (HER) and oxygen evolution reaction (OER) were characterized by linear voltammetry scanning (LSV) in 0.5 M H<sub>2</sub>SO<sub>4</sub> or 1.0 M KOH solution at a scanning speed of 5 mV s<sup>-1</sup>. The analysis of electrochemical surface area (ECSA) is calculated by double-layer capacitance ( $C_{dl}$ ). At first, CV scanning is performed at different scanning speeds (10, 30, 50, 70, 90, 100 mV s<sup>-1</sup>) to obtain the current of  $C_{dl}$ . Secondly, the double-layer current at 0.35 V is linearly fitted to the scanning rate, and its slope is the  $C_{dl}$ . Further divide the  $C_{dl}$  by the capacitance constant ( $C_{ref}$ , 60 mC cm<sup>-2</sup>) to obtain ECSA. Electrochemical stability testing is performed by two methods. Electrochemical stability testing is performed by two methods. One test method is to determine electrochemical stability by comparing HER activity before and after CV by a continuous scan of 1000 circles. Another stability test method is to continuously test HER activity at a fixed potential for 10 h. Electrochemical impedance spectroscopy (EIS) was recorded under the condition of frequency of 100 mHz ~ 100 kHz and ac voltage amplitude of 10 mV. For HER reaction, EIS spectrum was measured at an overpotential of 10 mV. While for OER reaction, EIS spectrum was measured at an overpotential of 300 mV. For the overall water splitting capability, a two-electrode system with Ir<sub>x</sub>Mn<sub>(1-x)</sub>O<sub>y</sub> hybrids electrodes

as anode (Load: 0.1 mg cm<sup>-2</sup>) and cathode (Load: 0.02 mg cm<sup>-2</sup>) was constructed in 0.5 M H<sub>2</sub>SO<sub>4</sub> solution, denoted as Ir<sub>x</sub>Mn<sub>(1-x)</sub>O<sub>y</sub> hybrids // Ir<sub>x</sub>Mn<sub>(1-x)</sub>O<sub>y</sub> hybrids. A comparative evaluation of Pt/C // IrO<sub>2</sub> water electrolyzer composed of Pt/C (cathode) (Load: 0.02 mg cm<sup>-2</sup>) and IrO<sub>2</sub> (anode) (Load: 0.1 mg cm<sup>-2</sup>) was carried out in 0.5 M H<sub>2</sub>SO<sub>4</sub> solution. The stability of the overall water splitting is maintained for 10 h at the potential of 1.55 V.

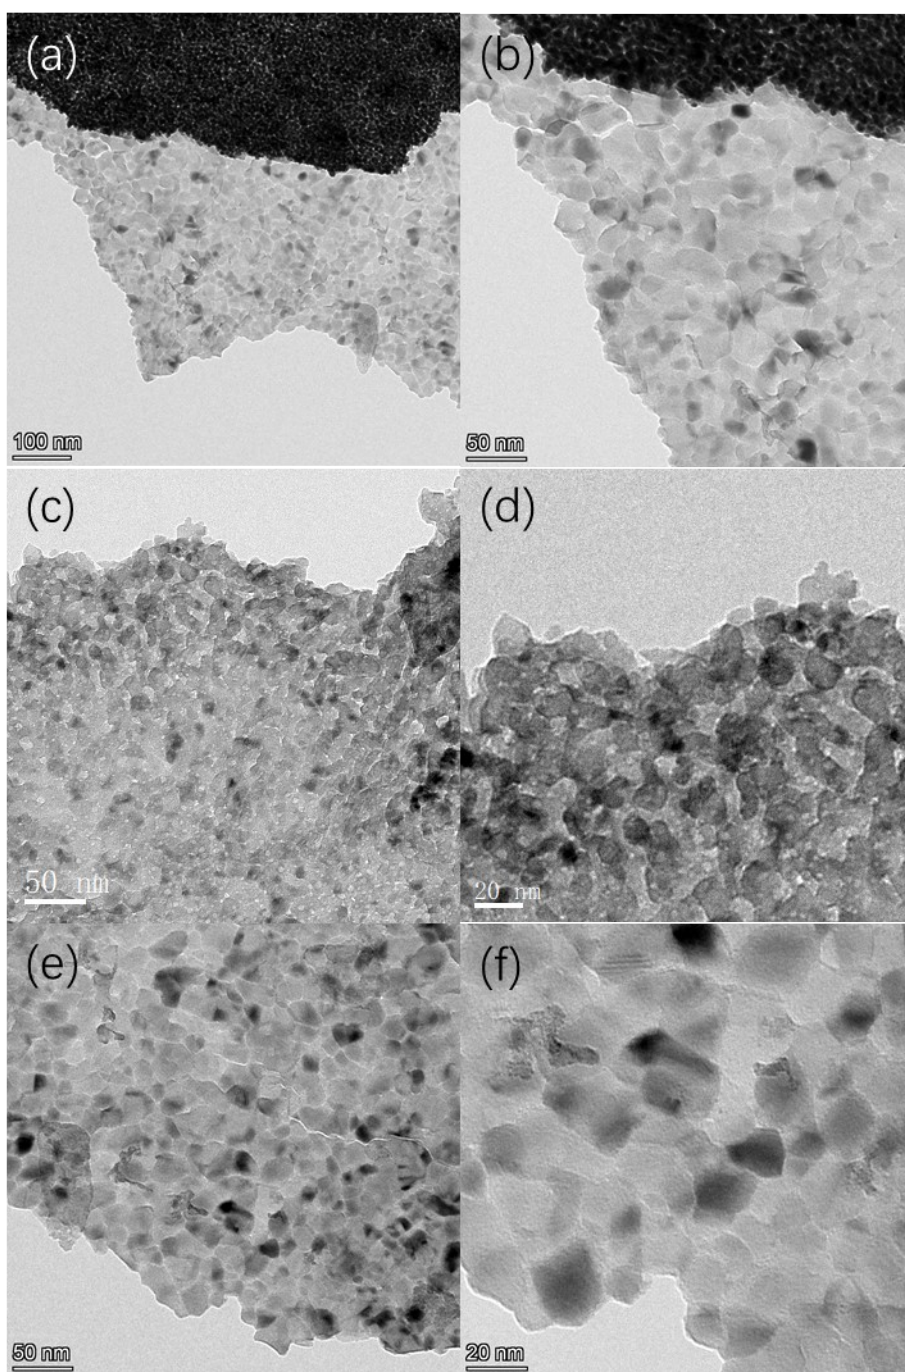

Figure S1 TEM images of  $\text{Ir}_{0.2}\text{Mn}_{0.8}\text{O}_y$  hybrids (a-b). TEM images of upper layer (c-d) and underlying layers (e-f) of  $\text{Ir}_{0.2}\text{Mn}_{0.8}\text{O}_y$  hybrids.

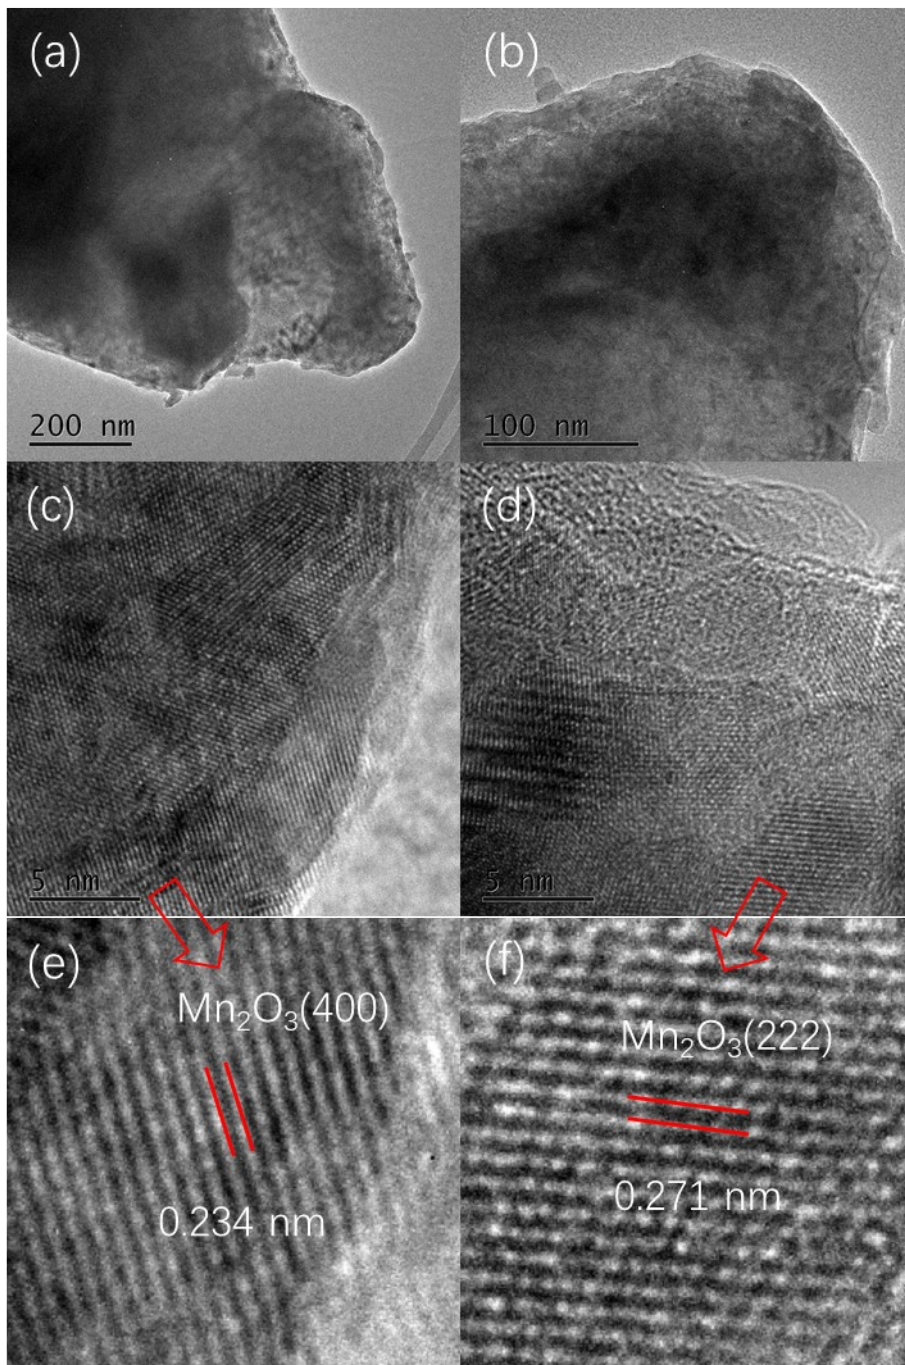

Figure S2 TEM and HRTEM images of  $\text{Mn}_2\text{O}_3$ .



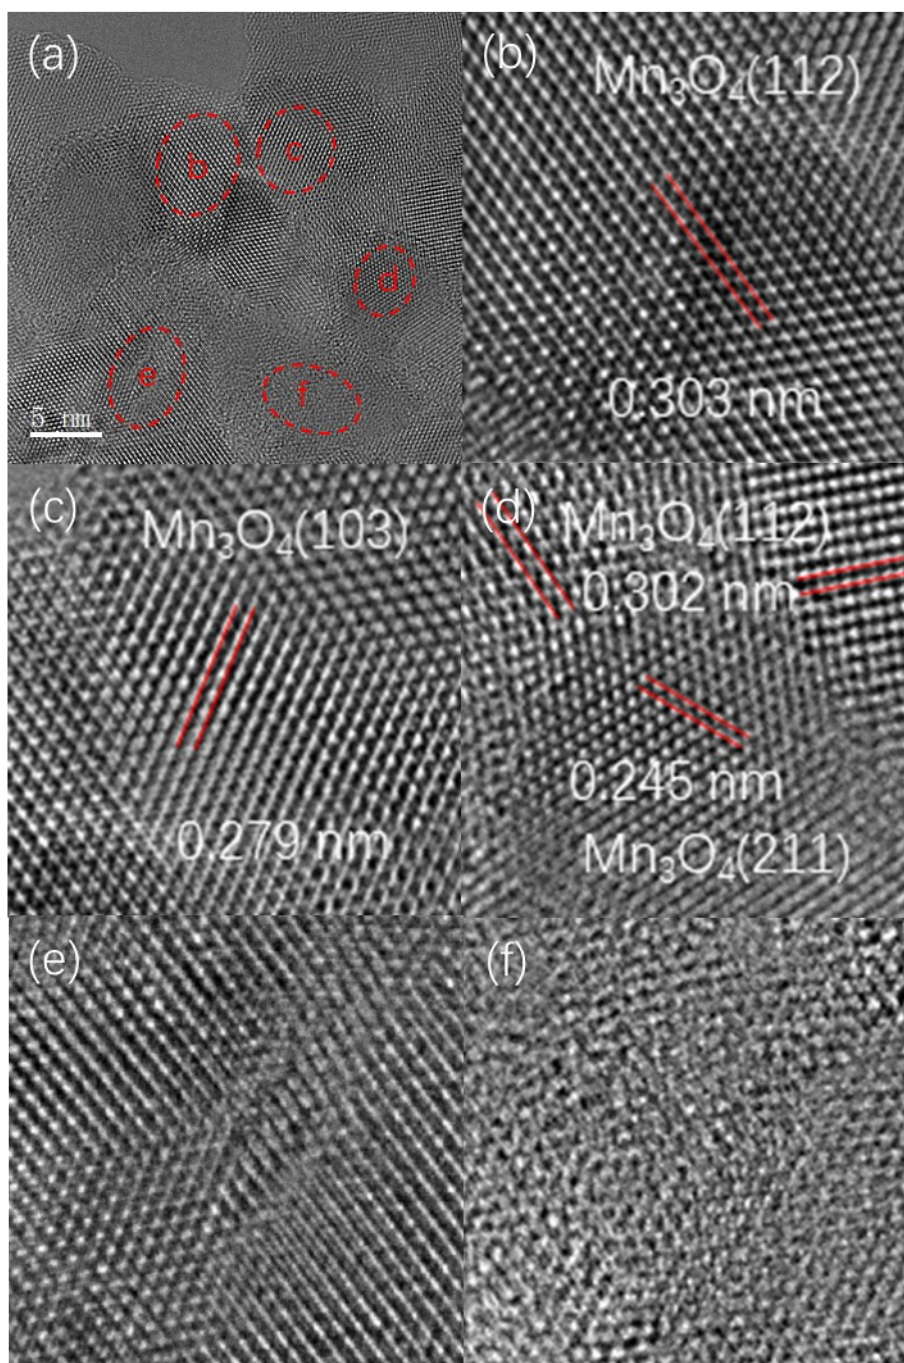

Figure S3 Lattice structures of Mn<sub>3</sub>O<sub>4</sub> in the bottom layer of Ir<sub>0.2</sub>Mn<sub>0.8</sub>O<sub>y</sub> hybrids.

In Fig. S3 a-d (ESI†), the (112) and (103) crystal planes of Mn<sub>3</sub>O<sub>4</sub> can be clearly observed. More importantly, a large number of lattice defects and amorphous regions can be clearly observed in Fig. S3 e-f (ESI†).

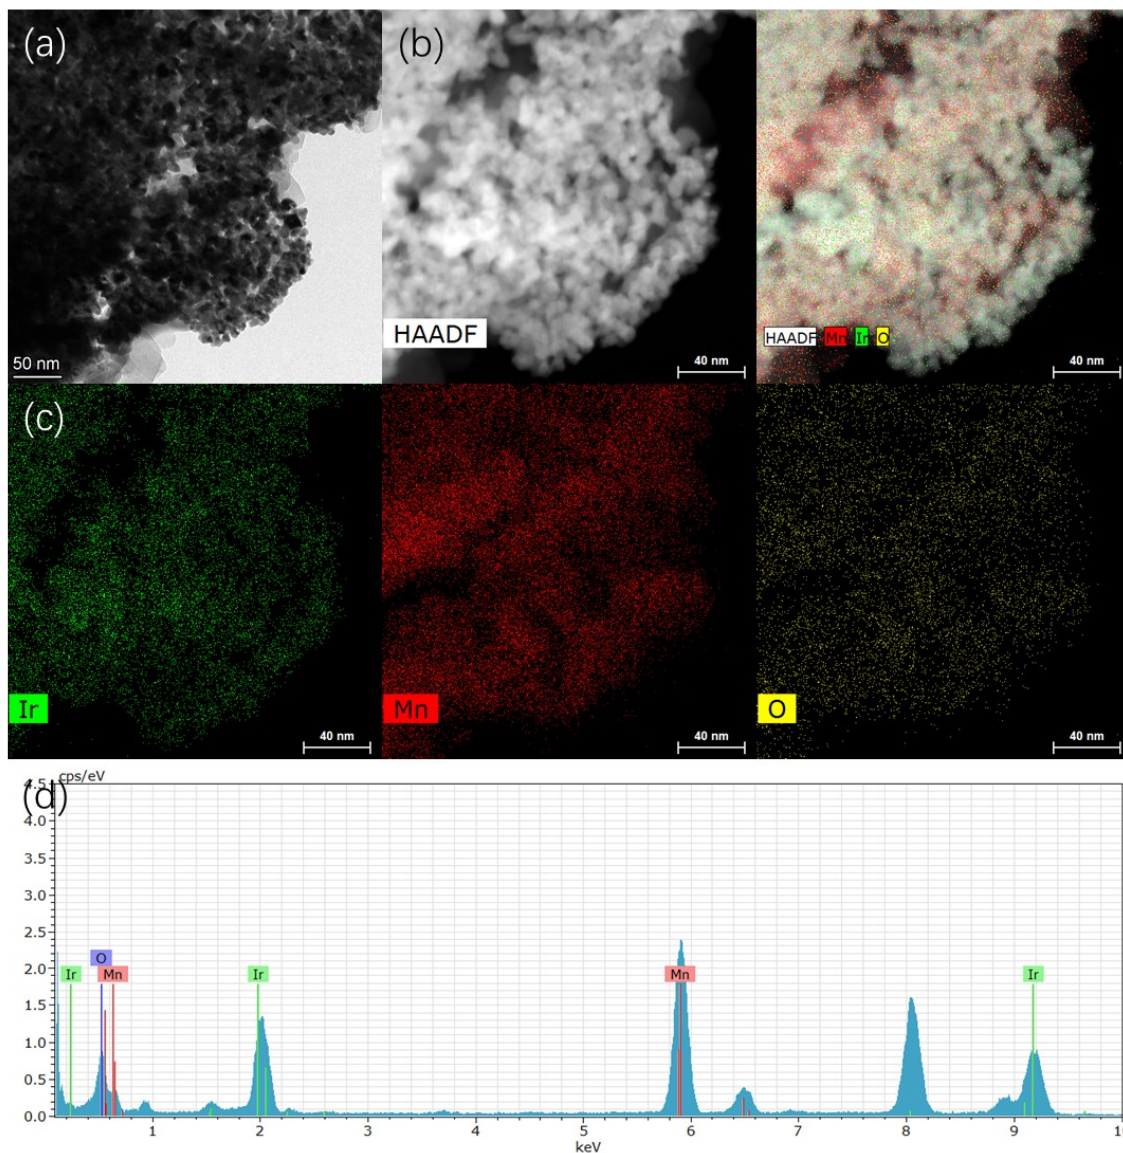

Figure S4 TEM (a), HAADF-STEM (b), HAADF-STEM mapping (c) and atomic ratio of Ir, Mn and O (d) of  $\text{Ir}_{0.2}\text{Mn}_{0.8}\text{O}_y$  hybrids.

It can be seen from the high-angle annular dark-field scanning transmission electron microscopy (HAADF-STEM) in Fig. S4a (ESI†), the particle size of the nanoparticles is about 10 nm. The distribution of Ir, Mn and O elements are very uniform in electrodes surface (Fig. S4 b-c, ESI†), and the molar ratio is 7.2:63.1:29.7 (Fig. S4d, ESI†).

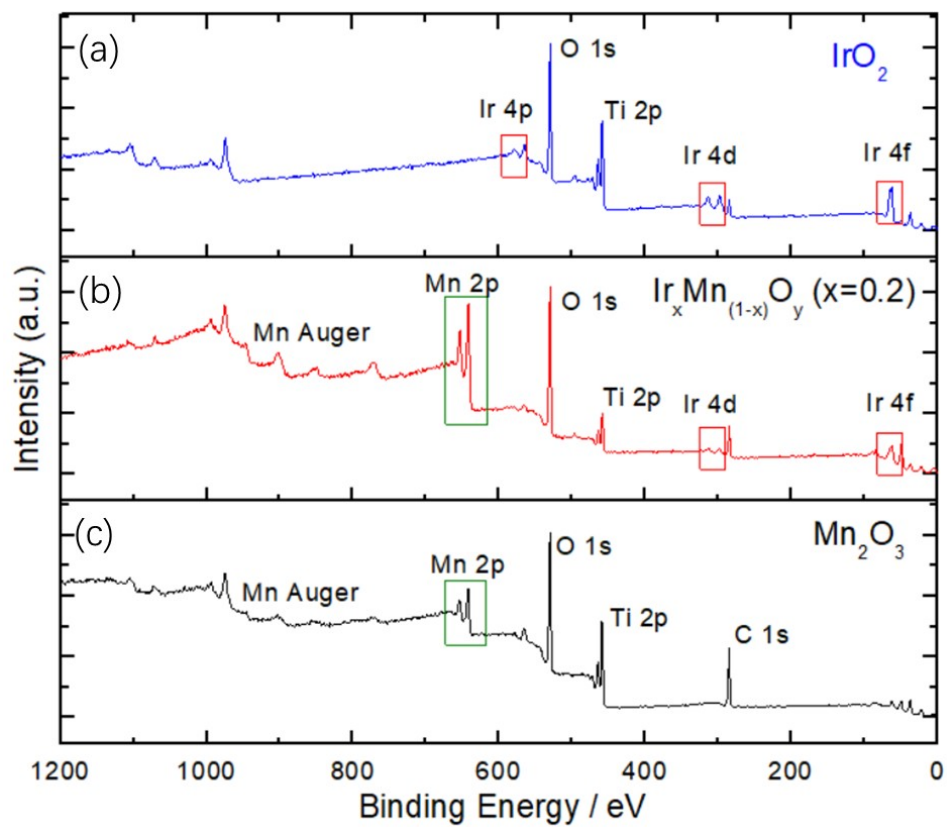

Figure S5 The XPS survey spectra of  $\text{IrO}_2$  (a),  $\text{Ir}_{0.2}\text{Mn}_{0.8}\text{O}_y$  hybrids (b) and  $\text{Mn}_2\text{O}_3$  (c).

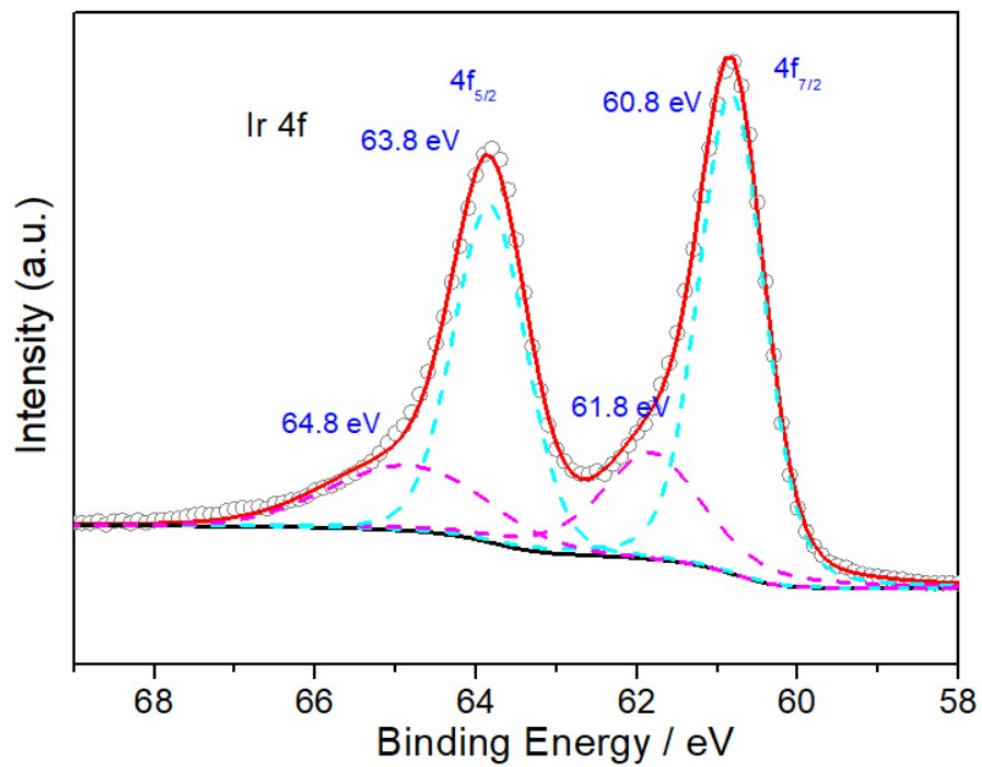

Figure S6 The XPS core-level spectra of Ir 4f of metal Ir.



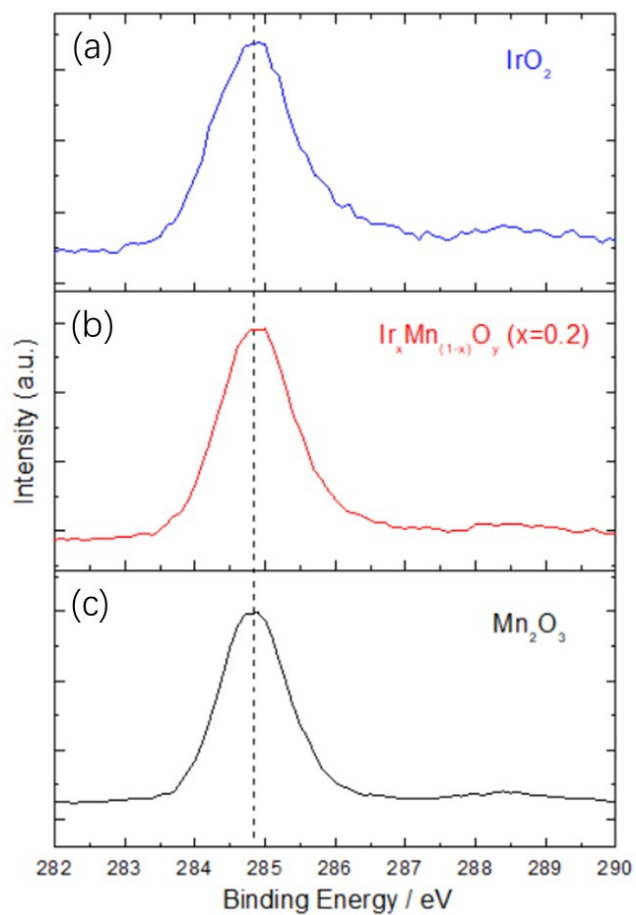

Figure S7 The XPS core-level spectra of C 1s of  $\text{IrO}_2$  (a),  $\text{Ir}_{0.2}\text{Mn}_{0.8}\text{O}_y$  hybrids (b) and  $\text{Mn}_2\text{O}_3$  (c).

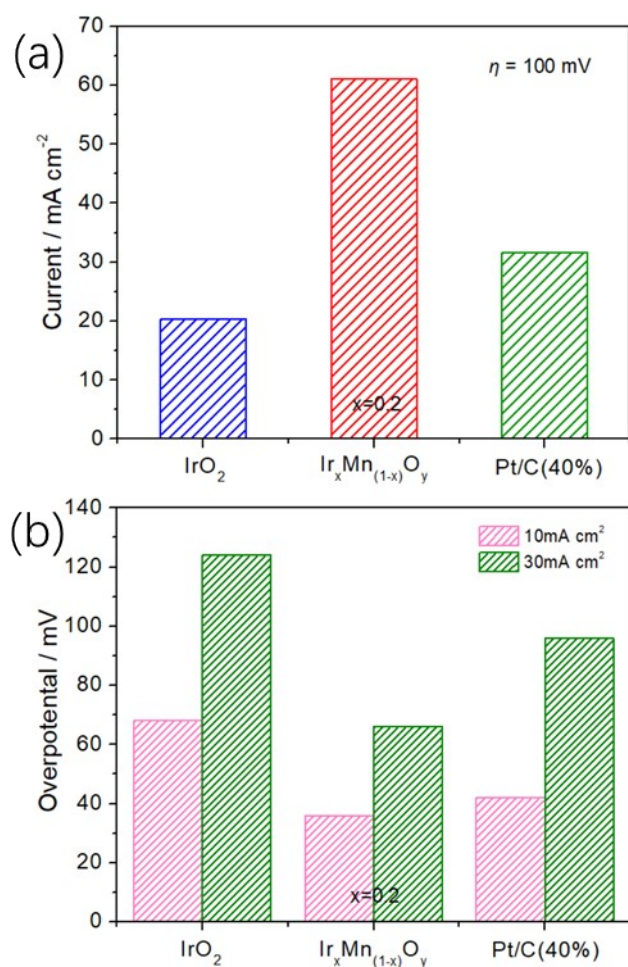

Figure S8 The apparent HER activities of IrO<sub>2</sub>, Ir<sub>0.2</sub>Mn<sub>0.8</sub>O<sub>y</sub> hybrids and Pt/C at an overpotential of 100 mV in 0.5 M H<sub>2</sub>SO<sub>4</sub> (a). Overpotentials of HER of IrO<sub>2</sub>, Ir<sub>0.2</sub>Mn<sub>0.8</sub>O<sub>y</sub> hybrids and Pt/C at apparent current densities of 10 and 30 mA cm<sup>-2</sup> (b) in 0.5 M H<sub>2</sub>SO<sub>4</sub>.

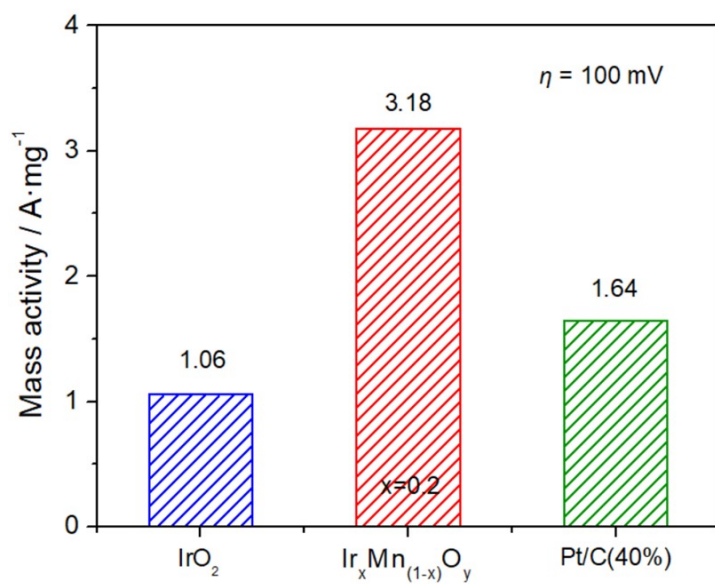

Figure S9 The mass activities of HER of IrO<sub>2</sub>, Ir<sub>0.2</sub>Mn<sub>0.8</sub>O<sub>y</sub> hybrids and Pt/C at an overpotential of 100 mV in 0.5 M H<sub>2</sub>SO<sub>4</sub>.

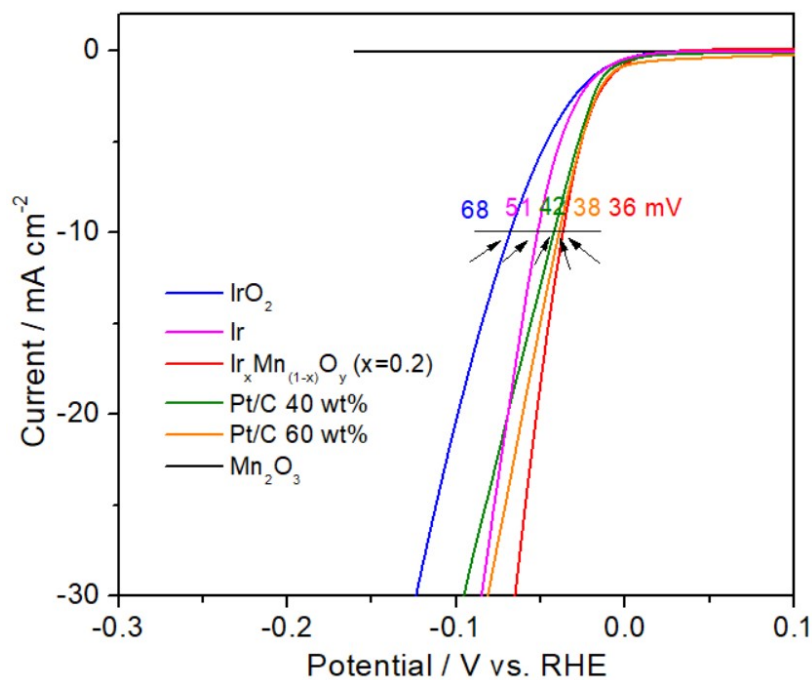

Figure S10 The apparent HER activities of  $\text{IrO}_2$ , Ir,  $\text{Ir}_{0.2}\text{Mn}_{0.8}\text{O}_y$  hybrids, 40 wt% Pt/C, 60 wt% Pt/C and  $\text{Mn}_2\text{O}_3$  in 0.5 M  $\text{H}_2\text{SO}_4$ .

The loading of platinum in 60 wt% Pt/C is 1.5 times that of 40 wt% Pt/C, so the HER activity of 60 wt% Pt/C is better than that of 40 wt% Pt/C. The overpotential of 60 wt% Pt/C is 38 mV to obtain the apparent current density of  $10 \text{ mA cm}^{-2}$ . However, the HER activity of 60 wt% Pt/C is still lower than that of  $\text{Ir}_{0.2}\text{Mn}_{0.8}\text{O}_y$  hybrids, even though the noble metal loading of 60 wt% Pt/C is 1.5 times that of  $\text{Ir}_{0.2}\text{Mn}_{0.8}\text{O}_y$  hybrids. The above results have indicated that  $\text{Ir}_{0.2}\text{Mn}_{0.8}\text{O}_y$  hybrids does exhibit the excellent HER activity in acidic system, especially at very low loading.



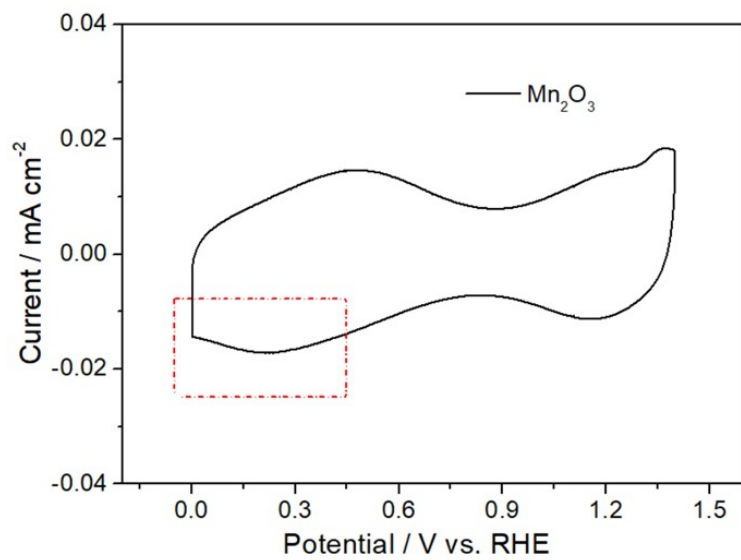

Figure S11 The cyclic voltammetry curve of  $\text{Mn}_2\text{O}_3$  in  $0.5 \text{ M H}_2\text{SO}_4$ .

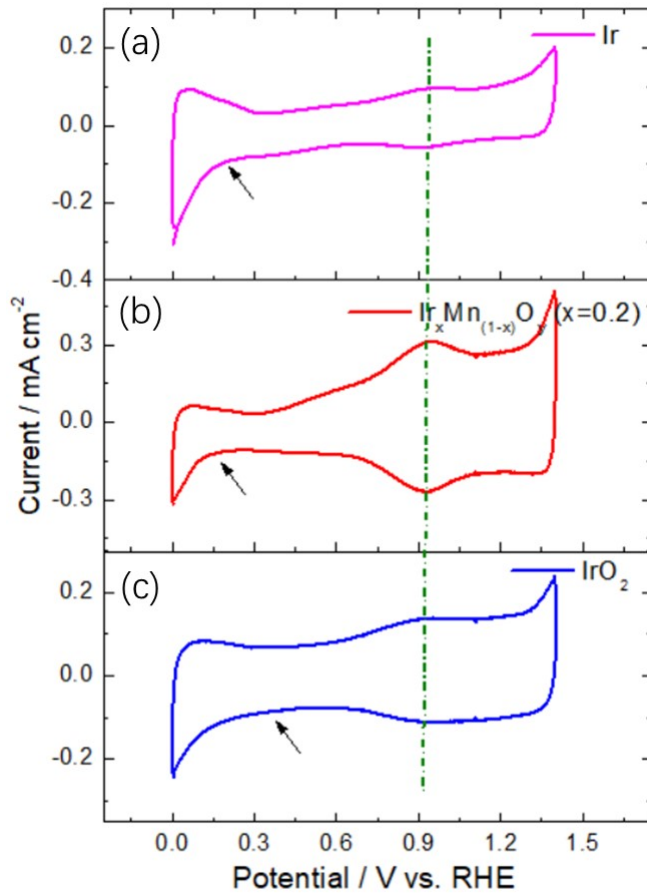

Figure S12 The cyclic voltammetry curves of Ir (a), Ir<sub>0.2</sub>Mn<sub>0.8</sub>O<sub>y</sub> hybrids (b) and IrO<sub>2</sub> (c) in 0.5 M H<sub>2</sub>SO<sub>4</sub>.

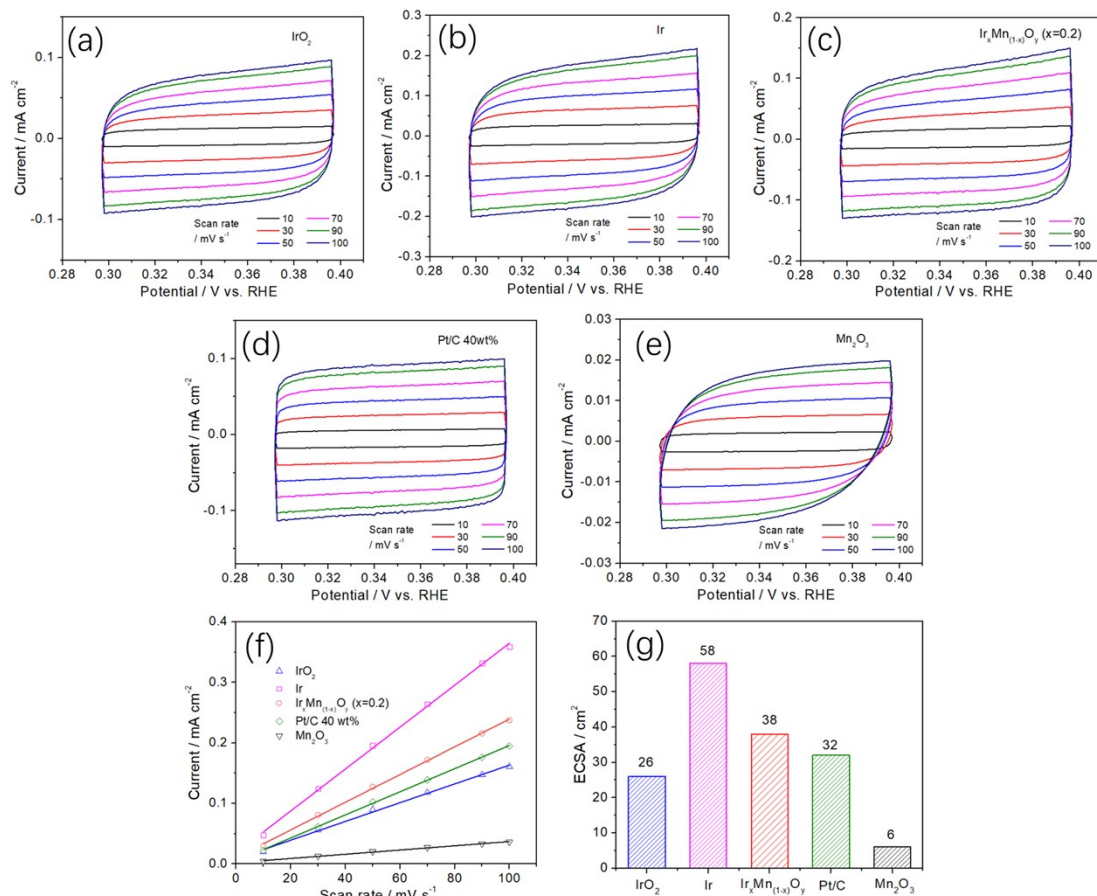

Figure S13 The double-capacitance curves of IrO<sub>2</sub> (a), Ir (b), Ir<sub>0.2</sub>Mn<sub>0.8</sub>O<sub>y</sub> hybrids (c), Pt/C (d) and Mn<sub>2</sub>O<sub>3</sub> (e) under different sweeping speeds in 0.5 M H<sub>2</sub>SO<sub>4</sub>. The double layer capacitance fitting curves of IrO<sub>2</sub>, Ir, Ir<sub>0.2</sub>Mn<sub>0.8</sub>O<sub>y</sub> hybrids, Pt/C and Mn<sub>2</sub>O<sub>3</sub> (f). The electrochemical surface areas (ECSAs) of IrO<sub>2</sub>, Ir, Ir<sub>0.2</sub>Mn<sub>0.8</sub>O<sub>y</sub> hybrids, Pt/C and Mn<sub>2</sub>O<sub>3</sub> (g).

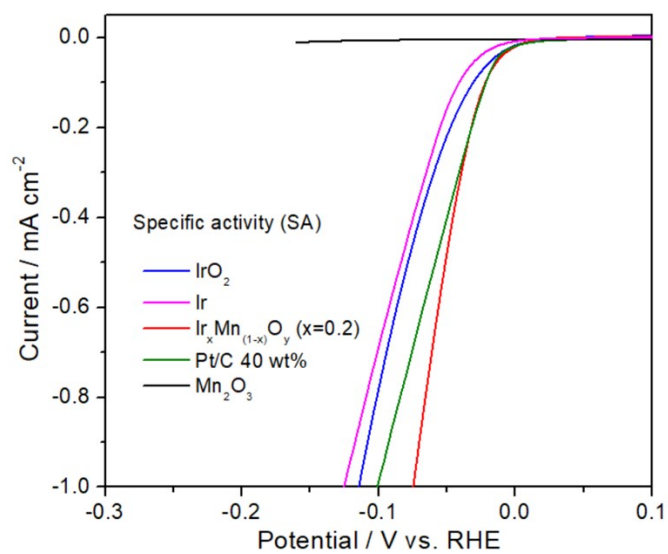

Figure S14 The specific activities (SAs) of IrO<sub>2</sub>, Ir, Ir<sub>0.2</sub>Mn<sub>0.8</sub>O<sub>y</sub> hybrids, Pt/C and Mn<sub>2</sub>O<sub>3</sub> in 0.5 M H<sub>2</sub>SO<sub>4</sub>.

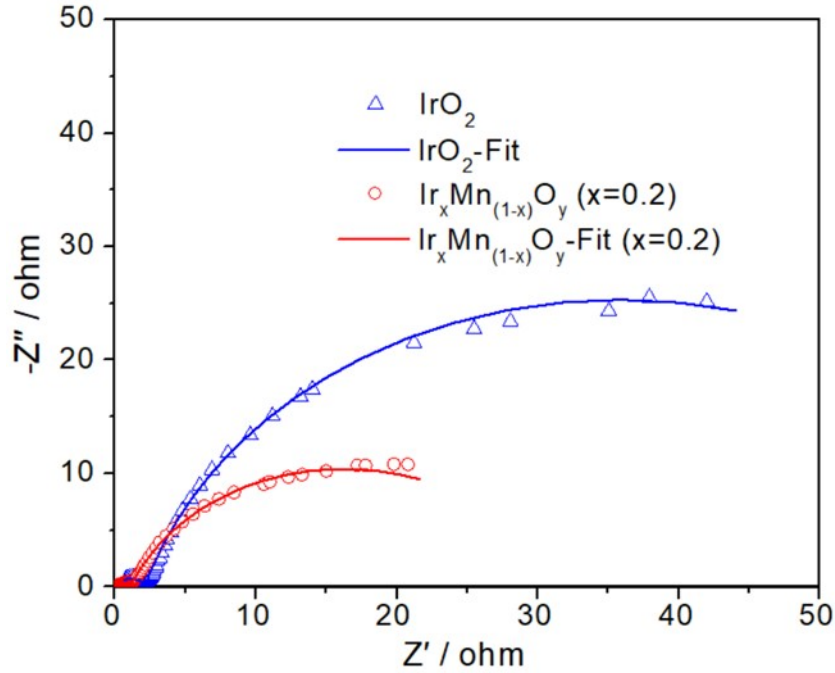

Figure S15 The EIS measurements of  $\text{Ir}_{0.2}\text{Mn}_{0.8}\text{O}_y$  hybrids and  $\text{IrO}_2$  at  $\eta = 10$  mV in 0.5 M  $\text{H}_2\text{SO}_4$ .

Fig. S15 (ESI†) are the Nyquist plots of  $\text{Ir}_{0.2}\text{Mn}_{0.8}\text{O}_y$  hybrids and  $\text{IrO}_2$  at the overpotential of 10 mV. Equivalent circuit fitted by Zview software ( $R_s(R_fC_f)(R_{ct}C_{dl})$ ). The  $R_s$  (the solution resistance) of  $\text{Ir}_{0.2}\text{Mn}_{0.8}\text{O}_y$  hybrids and  $\text{IrO}_2$  electrodes are almost the same, which are 0.287 and 0.281  $\Omega \text{ cm}^2$ , respectively. But for  $R_{ct}$  (the charge transfer resistance), the  $R_{ct}$  of  $\text{Ir}_{0.2}\text{Mn}_{0.8}\text{O}_y$  hybrids is 30.36  $\Omega \text{ cm}^2$ , and the  $R_{ct}$  of  $\text{IrO}_2$  is 67.56  $\Omega \text{ cm}^2$ . The  $R_{ct}$  of  $\text{Ir}_{0.2}\text{Mn}_{0.8}\text{O}_y$  hybrids is smaller, which indicates that the charge transfer is faster in the HER process, which is beneficial to improve the HER activity.

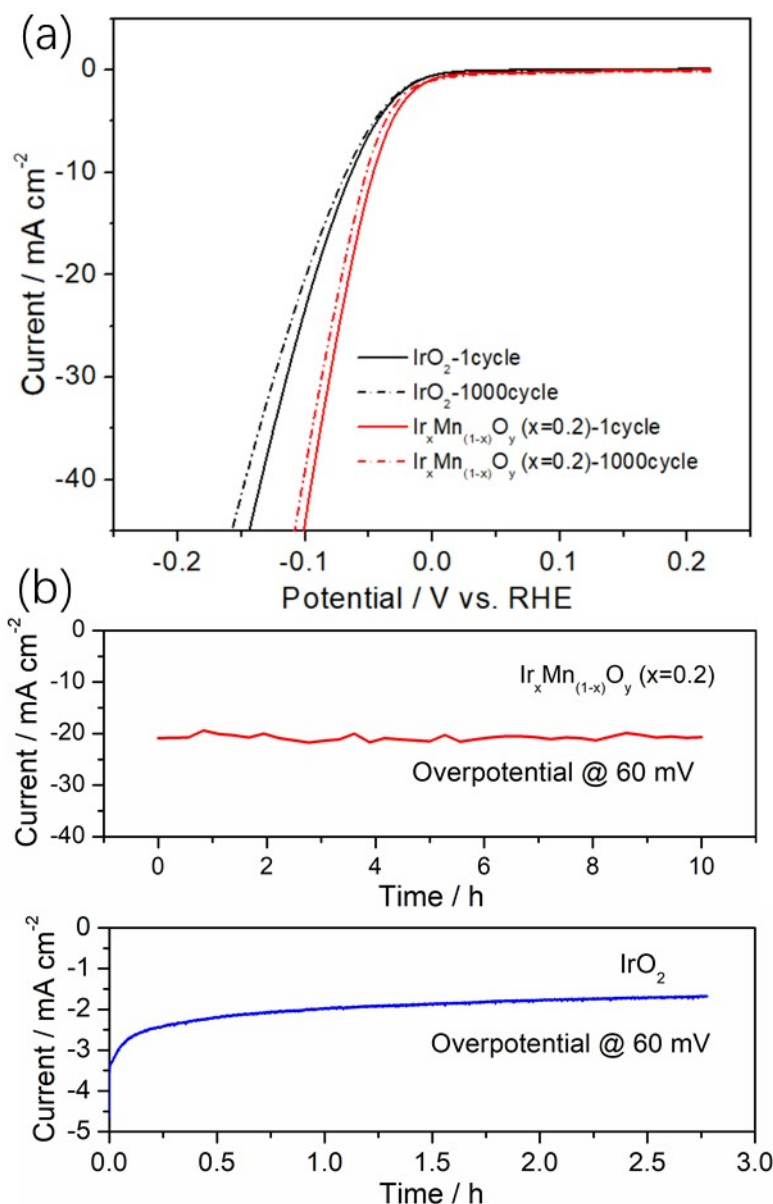

Figure S16 Accelerated life test of Ir<sub>0.2</sub>Mn<sub>0.8</sub>O<sub>y</sub> hybrids and IrO<sub>2</sub> through the consecutive CV scan measurements in 0.5 M H<sub>2</sub>SO<sub>4</sub> (a). Long-time stability tests of Ir<sub>0.2</sub>Mn<sub>0.8</sub>O<sub>y</sub> hybrids (b) and IrO<sub>2</sub> (c) at the overpotential of 60 mV in 0.5 M H<sub>2</sub>SO<sub>4</sub>.

Fig. S16 (ESI†) is the accelerated life test of the Ir<sub>0.2</sub>Mn<sub>0.8</sub>O<sub>y</sub> hybrids electrode. After 1000 cycles of CV scanning, the HER activity of the Ir<sub>0.2</sub>Mn<sub>0.8</sub>O<sub>y</sub> hybrids decreased slightly, which was obviously better than that of IrO<sub>2</sub> electrode in Fig. S16a (ESI†). After 10 h of chronoamperometry testing at the overpotential of 60 mV, the activity of HER decreased by only 0.91% (from 20.91 to 20.72 mA cm<sup>-2</sup>) for Ir<sub>0.2</sub>Mn<sub>0.8</sub>O<sub>y</sub> hybrids electrode in Fig. S16b (ESI†). For IrO<sub>2</sub>, its stability of chronoamperometry testing is much worse in Fig. S16c (ESI†).

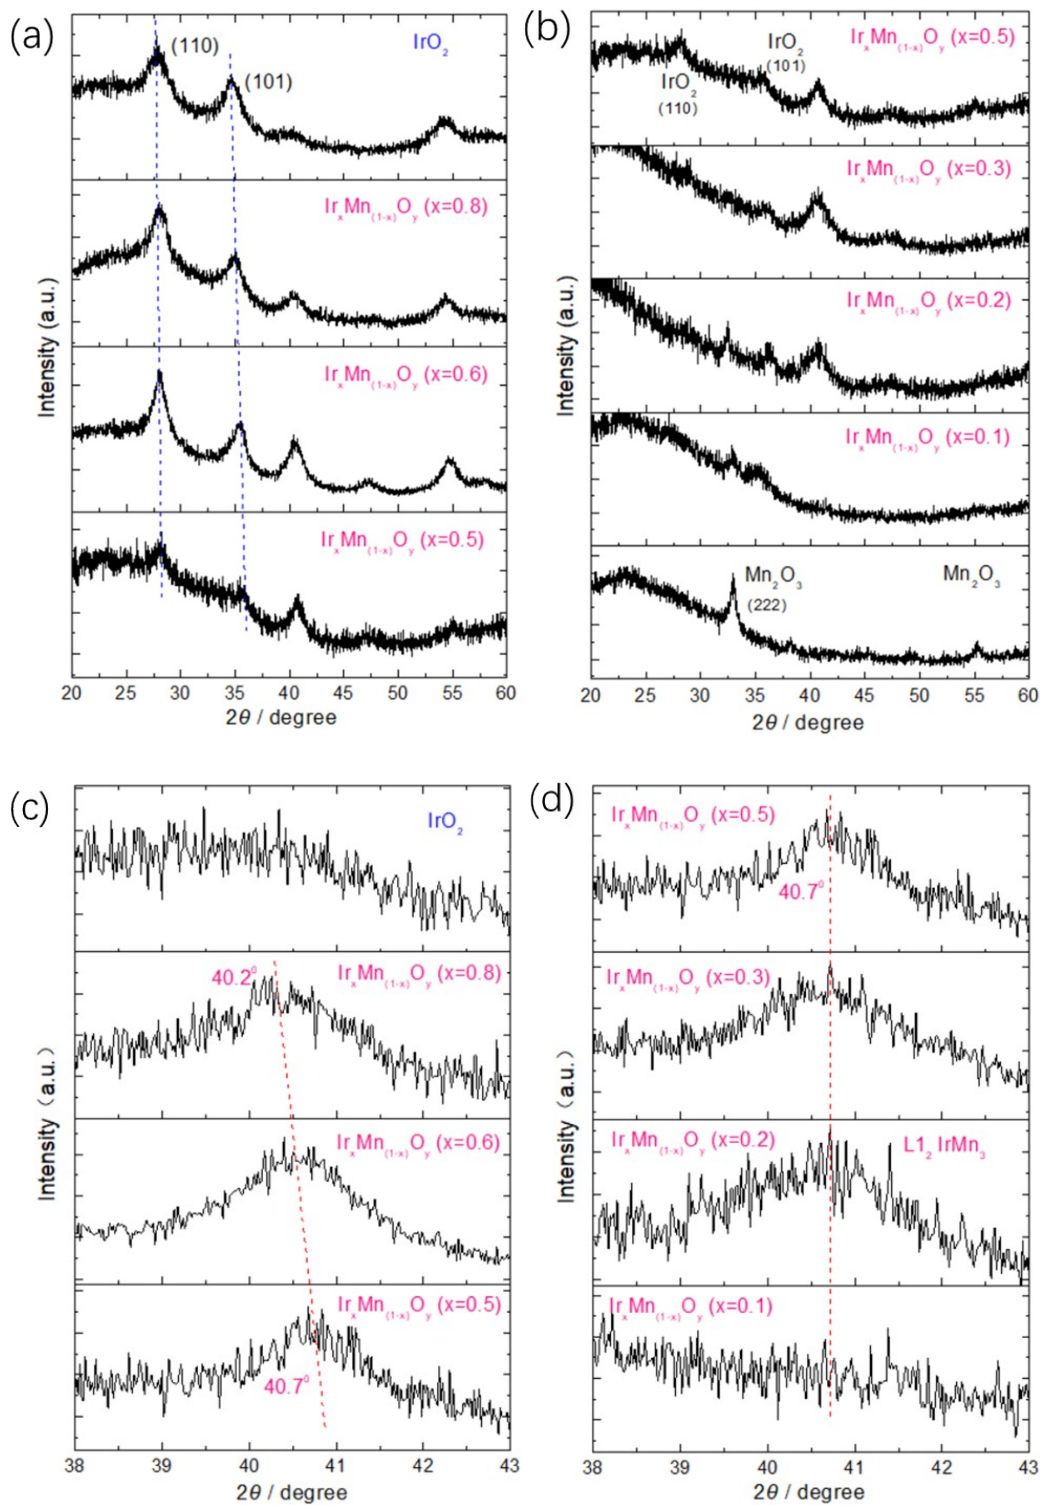

Figure S17 X-ray diffraction patterns of  $\text{IrO}_2$  and  $\text{Ir}_x\text{Mn}_{(1-x)}\text{O}_y$  hybrids ( $x=0.8, 0.6$  and  $0.5$ ) (a). X-ray diffraction patterns of  $\text{Ir}_x\text{Mn}_{(1-x)}\text{O}_y$  hybrids ( $x=0.5, 0.3, 0.2$  and  $0.1$ ) and  $\text{Mn}_2\text{O}_3$  (b). X-ray diffraction patterns of  $\text{Ir}_x\text{Mn}_{(1-x)}\text{O}_y$  hybrids with different  $x$  content in range of  $38 \sim 43^\circ$  (c)  $x > 0.5$ ; (d)  $x < 0.5$ .

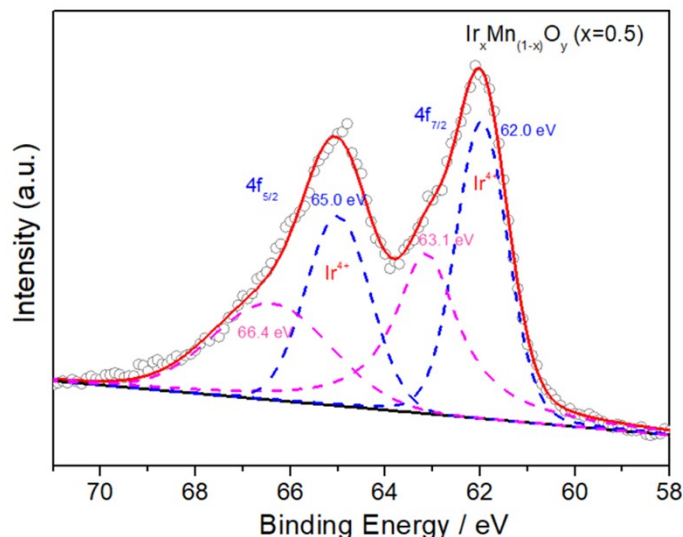

Figure S18 The XPS core-level spectra of Ir 4f of the  $\text{Ir}_x\text{Mn}_{(1-x)}\text{O}_y$  hybrids ( $x = 0.5$ ).

At first, as shown in Fig. S17a (ESI<sup>†</sup>), there are obvious (110) and (101) crystal planes of  $\text{IrO}_2$  in XRD patterns of  $\text{Ir}_x\text{Mn}_{(1-x)}\text{O}_y$  hybrids ( $x > 0.5$ ). It can also be found that with the addition of Mn, the (110) and (101) crystal planes of  $\text{IrO}_2$  continuously move forward. Especially for the (101) crystal plane, it has been positively moved from  $34.6^\circ$  ( $x = 1.0$ ) to  $35.7^\circ$  ( $x = 0.5$ ). This is due to the insertion of Mn atoms into the lattice of  $\text{IrO}_2$ . But the (110) and (101) crystal planes of  $\text{IrO}_2$  are no longer obvious in  $\text{Ir}_x\text{Mn}_{(1-x)}\text{O}_y$  hybrids ( $x < 0.5$ ) in Fig. S17b (ESI<sup>†</sup>). Therefore,  $\text{IrO}_2$  is no longer the active center, for  $\text{Ir}_x\text{Mn}_{(1-x)}\text{O}_y$  hybrids ( $x < 0.5$ ). Secondly, an obvious diffraction peak appears at  $40.2^\circ$  in Fig. S17a (ESI<sup>†</sup>), which cannot be clearly observed in the XRD pattern of  $\text{IrO}_2$ . Further, it can be found by carefully observing in Fig. S17c (ESI<sup>†</sup>) that the diffraction peak at  $40.2^\circ$  will continue to be shifted with the addition of Mn. It can be found that the diffraction peak shifts from  $40.2^\circ$  ( $x = 1.0$ ) to  $40.7^\circ$  ( $x = 0.5$ ). However, in Fig. S17d (ESI<sup>†</sup>), the diffraction peak is no longer moved, but is fixed to  $40.7^\circ$  ( $x < 0.5$ ). When the Mn content is high, the newly formed diffraction peak should be attributed to the special characteristic diffraction peak of  $\text{Ir}_x\text{Mn}_{(1-x)}\text{O}_y$  hybrids. According to previous literature, the diffraction peak near  $41^\circ$  can correspond to  $\text{Ir}(111)$  or  $\text{MnO}(222)$  crystal plane, and can also be attributed to  $\text{IrMn}_3(111)$  crystal plane. If the metal Ir is regarded as the active center, there will be a contradiction. The specific contradiction is that from  $x=0.5$  to  $x=0.1$ , the amount of  $\text{H}_2\text{IrCl}_6$  added is gradually reduced, so the formed metal Ir is also gradually reduced. If the metal Ir is the active center, the activity of the  $\text{Ir}_x\text{Mn}_{(1-x)}\text{O}_y$  hybrids ( $x < 0.5$ ) should decrease gradually, but this is contrary to the experimental results. At the same time, XPS results have shown that when  $x=0.5$ , there is no metallic Ir on the surface of  $\text{Ir}_x\text{Mn}_{(1-x)}\text{O}_y$  hybrids, but an oxidized Ir (Fig. S18, ESI<sup>†</sup>). Only when  $x=0.2$ ,  $\text{Ir}^{0+}$  4f has already appeared in XPS spectra of  $\text{Ir}_x\text{Mn}_{(1-x)}\text{O}_y$  hybrids in Fig. 2a. Therefore, when  $x < 0.5$ , it can be considered as a process of gradually forming  $\text{IrMn}_3$  phase with the increase of Mn content. With the formation of  $\text{IrMn}_3$  phase, HER activity is



increasing, so it is presumed to be the real active center. For  $\text{Ir}_x\text{Mn}_{(1-x)}\text{O}_y$  hybrids ( $x = 0.1$ ), because of the high Mn content and low Ir content, the  $\text{IrMn}_3$  phase can not be effectively formed, so the HER activity drops sharply.

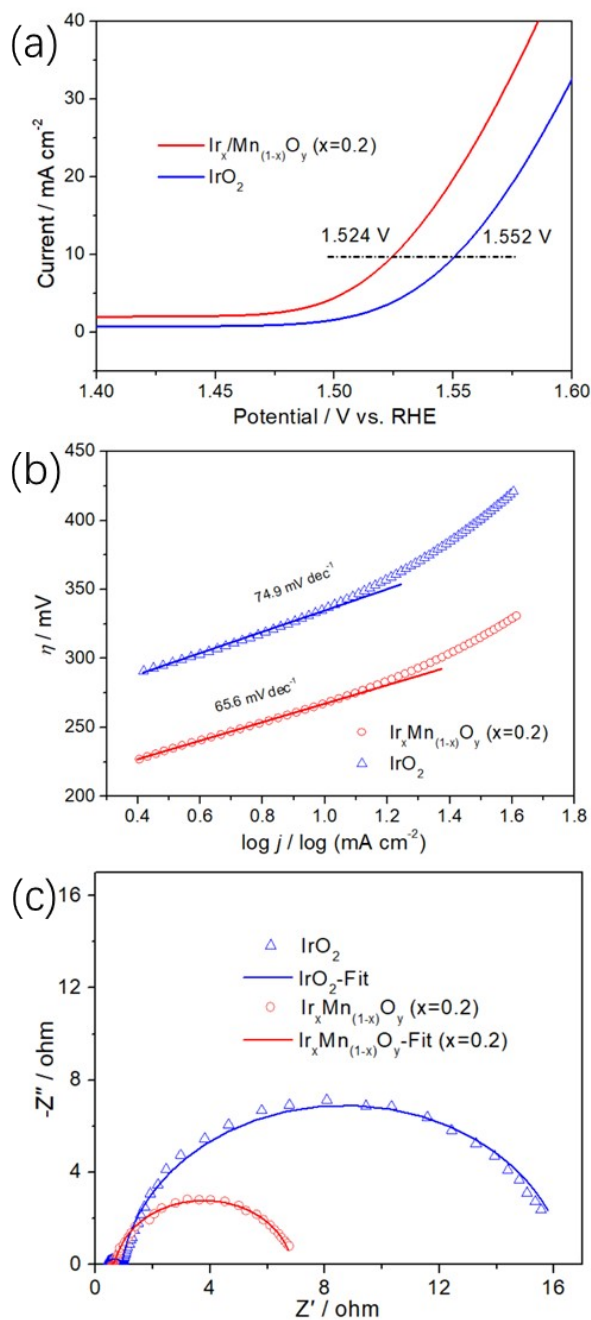

Figure S19 The OER activities (a) and Tafel slopes (b) of  $\text{Ir}_{0.2}\text{Mn}_{0.8}\text{O}_y$  hybrids and  $\text{IrO}_2$  in  $0.5 \text{ M H}_2\text{SO}_4$ . The EIS measurements of  $\text{Ir}_{0.2}\text{Mn}_{0.8}\text{O}_y$  hybrids and  $\text{IrO}_2$  at overpotential of 300 mV in  $0.5 \text{ M H}_2\text{SO}_4$  (c).

As shown in Fig. S19 (ESI<sup>†</sup>), the OER activity of  $\text{Ir}_{0.2}\text{Mn}_{0.8}\text{O}_y$  hybrids is better than that of  $\text{IrO}_2$  electrode. At the same time, the Tafel slope ( $65.6 \text{ mV dec}^{-1}$ ) and electrochemical transfer resistance ( $6.15 \text{ } \Omega \text{ cm}^2$ ) of  $\text{Ir}_{0.2}\text{Mn}_{0.8}\text{O}_y$  hybrids are lower than those of  $\text{IrO}_2$  electrode ( $74.9 \text{ mV dec}^{-1}$  and  $15.53 \text{ } \Omega \text{ cm}^2$ ). The above analysis indicates that the  $\text{Ir}_{0.2}\text{Mn}_{0.8}\text{O}_y$  hybrids has excellent OER activity.

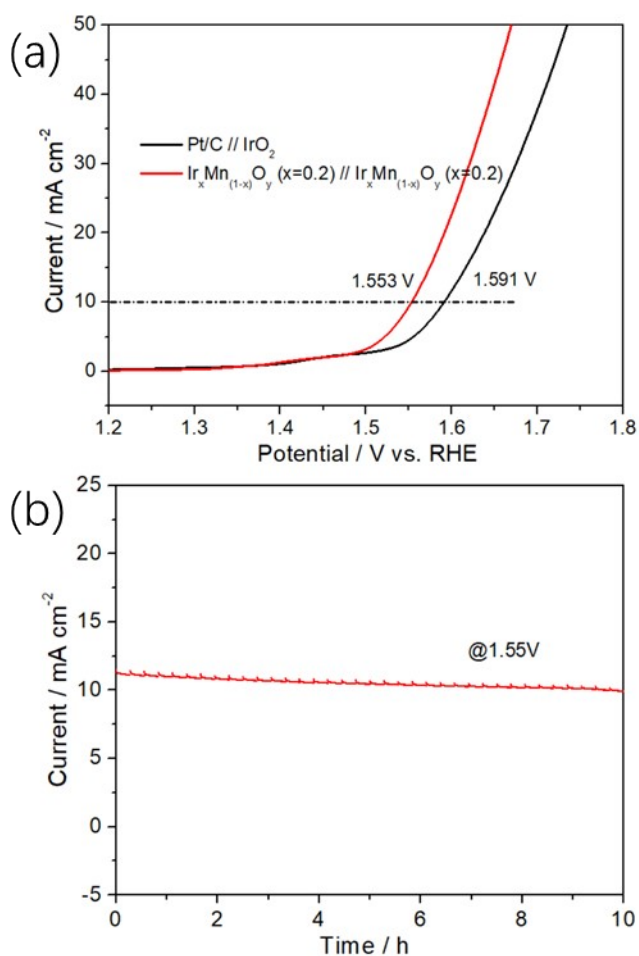

Figure S20 The overall water splitting capabilities of  $\text{Ir}_x\text{Mn}_{(1-x)}\text{O}_y$  ( $x=0.2$ ) //  $\text{Ir}_x\text{Mn}_{(1-x)}\text{O}_y$  ( $x=0.2$ ) and Pt/C //  $\text{IrO}_2$  in 0.5 M  $\text{H}_2\text{SO}_4$  solution (a). The overall water splitting stability of  $\text{Ir}_x\text{Mn}_{(1-x)}\text{O}_y$  ( $x=0.2$ ) (Load: 0.02  $\text{mg cm}^{-2}$ ) //  $\text{Ir}_x\text{Mn}_{(1-x)}\text{O}_y$  ( $x=0.2$ ) (Load: 0.1  $\text{mg cm}^{-2}$ ) in 0.5 M  $\text{H}_2\text{SO}_4$  solution (b).

Further, in order to verify the overall water splitting capability, in 0.5 M  $\text{H}_2\text{SO}_4$  solution, a two-electrode system with  $\text{Ir}_{0.2}\text{Mn}_{0.8}\text{O}_y$  hybrids electrodes as anode and cathode was constructed, denoted as  $\text{Ir}_x\text{Mn}_{(1-x)}\text{O}_y$  hybrids //  $\text{Ir}_x\text{Mn}_{(1-x)}\text{O}_y$  hybrids. A comparative evaluation of Pt/C //  $\text{IrO}_2$  water electrolyzer composed of Pt/C (cathode) and  $\text{IrO}_2$  (anode) was carried out. The recorded polarization curves in Fig. S20a (ESI†) indicate that the  $\text{Ir}_x\text{Mn}_{(1-x)}\text{O}_y$  hybrids //  $\text{Ir}_x\text{Mn}_{(1-x)}\text{O}_y$  hybrids require a lower voltage of 1.553 V to achieve 10  $\text{mA cm}^{-2}$ , smaller than 1.591 V required for Pt/C //  $\text{IrO}_2$ . Moreover, when the applied voltage is set at 1.56 V, a constant current density of 10  $\text{mA cm}^{-2}$  is well maintained for 10 h in Fig. S20b (ESI†).

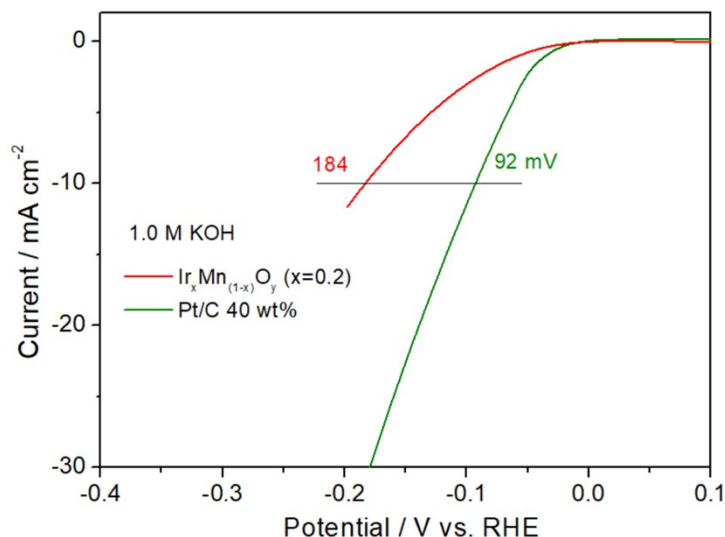

Figure S21 The apparent HER activities of Ir<sub>0.2</sub>Mn<sub>0.8</sub>O<sub>y</sub> hybrids and 40 wt% Pt/C in 1.0 M KOH.

The HER activity of Ir<sub>x</sub>Mn<sub>(1-x)</sub>O<sub>y</sub> hybrids in alkaline solution has also been tested. However, the HER activity of Ir<sub>x</sub>Mn<sub>(1-x)</sub>O<sub>y</sub> in alkaline solution is not ideal. At the apparent current density of 10 mA cm<sup>-2</sup>, the overpotentials of Ir<sub>0.2</sub>Mn<sub>0.8</sub>O<sub>y</sub> hybrids and Pt/C electrodes is 184 and 92 mV, respectively. Here, the performance of Ir<sub>0.2</sub>Mn<sub>0.8</sub>O<sub>y</sub> hybrid is obviously worse than that of Pt/C. This is because it is more difficult to break the HO-H bond in H<sub>2</sub>O to get hydrogen intermediate in alkaline solution than that in acid solution. For Ir<sub>0.2</sub>Mn<sub>0.8</sub>O<sub>y</sub> hybrids, the adsorption energy of H was modified through the formation of L1<sub>2</sub>-IrMn<sub>3</sub> phase, the acidic HER activity was improved. However, its ability to destroy HO-H bond in alkaline solution has not been improved, so its alkaline HER activity is poor.

Table S1 Composition analysis of  $\text{Ir}_x\text{Mn}_{(1-x)}\text{O}_y$  hybrids with different Ir-Mn ratios by XRF

| $\text{Ir}_x\text{Mn}_{(1-x)}\text{O}_y$<br>hybrids | Consumption / mol% |    | Content / mol% |        |
|-----------------------------------------------------|--------------------|----|----------------|--------|
|                                                     | Ir                 | Mn | Ir             | Mn     |
| x=0.2                                               | 20                 | 80 | 20.020         | 79.980 |
| x=0.3                                               | 30                 | 70 | 37.839         | 62.161 |
| x=0.5                                               | 50                 | 50 | 45.851         | 54.149 |
| x=0.6                                               | 60                 | 40 | 74.109         | 25.891 |
| x=0.8                                               | 80                 | 20 | 80.380         | 19.620 |
| x=0.9                                               | 90                 | 10 | 93.856         | 6.144  |

According to XPS test results, for  $\text{Ir}_x\text{Mn}_{(1-x)}\text{O}_y$  hybrids (x=0.2), the atomic ratio of Ir and Mn is 1.76:19.08. The molar ratio of Ir-Mn near the electrode surface is obviously lower than those of STEM-mapping and XRF, which indicates that Mn is obviously enriched on the surface.

Table S2. Comparison of HER activities between optimized Ir<sub>x</sub>Mn<sub>(1-x)</sub>O<sub>y</sub> hybrids (x=0.2) and other ultra-low load Ir-based electrocatalysts in literatures.

| Catalyst                                                                 | Electrolyte                              | Ir Loading<br>( $\mu\text{g cm}^{-2}$ ) | $\eta_{10}$<br>(mV) | Tafel slope<br>mV dec <sup>-1</sup> | References                                                                         |
|--------------------------------------------------------------------------|------------------------------------------|-----------------------------------------|---------------------|-------------------------------------|------------------------------------------------------------------------------------|
| <b>Ir<sub>x</sub>Mn<sub>(1-x)</sub>O<sub>y</sub><br/>hybrids (x=0.2)</b> | <b>0.5 M H<sub>2</sub>SO<sub>4</sub></b> | <b>19.2</b>                             | <b>36</b>           | <b>31.6</b>                         | <b>This work<br/>without iR-compensation</b>                                       |
| Ir-NCNSs                                                                 | 0.5 M H <sub>2</sub> SO <sub>4</sub>     | 2.54                                    | 46.3                | 52                                  | ACS Appl. Mater. Interfaces, 2021, 13, 22448–22456. (1)<br>without iR-compensation |
| IrNiTa/Si                                                                | 0.5 M H <sub>2</sub> SO <sub>4</sub>     | 8.14                                    | 99                  | 35                                  | Adv. Mater., 2020, 32, 1906384. (2)                                                |
| AuIr@CNT                                                                 | 0.5 M H <sub>2</sub> SO <sub>4</sub>     | 14.3                                    | 27.3                | 30.2                                | J. Mater. Chem. A, 2020, 8, 20168–20174. (3)<br>without iR-compensation            |
| Au@AuIr <sub>2</sub>                                                     | 0.5 M H <sub>2</sub> SO <sub>4</sub>     | 20                                      | 29                  | 15.6                                | J. Am. Chem. Soc., 2021, 143, 4639–4645. (4)<br>90% iR-compensation                |
| CB[6]-Ir <sub>2</sub>                                                    | 0.5 M H <sub>2</sub> SO <sub>4</sub>     | 20                                      | 54                  | 30                                  | ACS Energy Lett., 2019, 4, 1301–1307. (5)<br>100% iR-compensation                  |
| np-Ir <sub>70</sub> Ni <sub>30</sub>                                     | 0.5 M H <sub>2</sub> SO <sub>4</sub>     | 20.24                                   | 35.2                | 43                                  | ACS Nano, 2021, 15, 5333–5340. (6)<br>iR-compensation                              |
| Ir_VG                                                                    | 0.5 M H <sub>2</sub> SO <sub>4</sub>     | 50                                      | 47                  | 43                                  | J. Mater. Chem. A, 2019, 7, 20590–20596. (7)                                       |
| Ir-NS                                                                    | 0.5 M H <sub>2</sub> SO <sub>4</sub>     | 71                                      | 31                  | 17.2                                | Chem. Commun., 2021, 57, 8620–8623. (8)                                            |

## References

1. X. Wu, Z. Wang, K. Chen, Z. Li, B. Hu, L. Wang and M. Wu, Unravelling the Role of Strong Metal–Support Interactions in Boosting the Activity toward Hydrogen Evolution Reaction on Ir Nanoparticle/N-Doped Carbon Nanosheet Catalysts, *ACS Appl. Mater. Interfaces*, 2021, 13, 22448–22456.
2. Z.-J. Wang, M.-X. Li, J.-H. Yu, X.-B. Ge, Y.-H. Liu, W.-H. Wang, Low-Iridium-Content IrNiTa Metallic Glass Films as Intrinsically Active Catalysts for Hydrogen Evolution Reaction. *Adv. Mater.*, 2020, 32, 1906384.
3. H. Hu, F. M. D. Kazim, Z. Ye, Y. Xie, Q. Zhang, K. Qu, J. Xu, W. Cai, S. Xiao and Z. Yang, Electronically delocalized Ir enables efficient and stable acidic water splitting, *J. Mater. Chem. A*, 2020, 8, 20168–20174.
4. H. Wang, Z. Chen, D. Wu, M. Cao, F. Sun, H. Zhang, H. You, W. Zhuang and R. Cao, Significantly Enhanced Overall Water Splitting Performance by Partial Oxidation of Ir through Au Modification in Core–Shell Alloy Structure, *J. Am. Chem. Soc.*, 2021, 143, 4639–4645.
5. H. You, D. Wu, Z. Chen, F. Sun, H. Zhang, Z. Chen, M. Cao, W. Zhuang and R. Cao, Highly Active and Stable Water Splitting in Acidic Media Using a Bifunctional Iridium/Cucurbit[6]uril Catalyst, *ACS Energy Lett.*, 2019, 4, 1301–1307.
6. Y. Yu, K. Jiang, M. Luo, Y. Zhao, J. Lan, M. Peng, F. M. F. de Groot and Y. Tan, Self-Activated Catalytic Sites

on Nanoporous Dilute Alloy for High-Efficiency Electrochemical Hydrogen Evolution, *ACS Nano*, 2021, 15, 5333–5340.

7. S. B. Roy, K. Akbar, J. H. Jeon, S.-K. Jerng, L. Truong, K. Kim, Y. Yi and S.-H. Chun, Iridium on vertical graphene as an all-round catalyst for robust water splitting reactions, *J. Mater. Chem. A*, 2019, 7, 20590–20596.

8. Y. Xie, X. Long, X. Li, C. Chang, K. Qu and Z. Yang, The template synthesis of ultrathin metallic Ir nanosheets as a robust electrocatalyst for acidic water splitting, *Chem. Commun.*, 2021, 57, 8620–8623.
